# Supplementary material for: Polyacrylamide-protected gold nanoparticles for the determination of manganese ions
Source: Royal Society of Chemistry journal article supplement (doi:10.1039/c5ay02483h), 2015-01-01
Supplement: c5ay02483h1.pdf [file c5ay02483h1.pdf]

# Supporting Information

## Poly-acrylamide protected gold nanoparticles for determination of manganese ions

Lulu Xun,<sup>a,b</sup> Juan Qiao,<sup>b</sup> Li Qi,<sup>\*b</sup> Jie Huang<sup>a</sup> and Huiwu Cai<sup>\*a</sup>

<sup>a</sup> School of chemistry and chemical engineering, Xi'an University of Science and Technology, Shaanxi, 710054, P. R. China

<sup>b</sup> Beijing National Laboratory for Molecular Sciences, Key Laboratory of Analytical Chemistry for Living Biosystems, Institute of Chemistry, Chinese Academy of Sciences, Beijing, 100190, P. R. China

\* Correspondence:

[qili@iccas.ac.cn](mailto:qili@iccas.ac.cn)

[caihuiwu@126.com](mailto:caihuiwu@126.com)

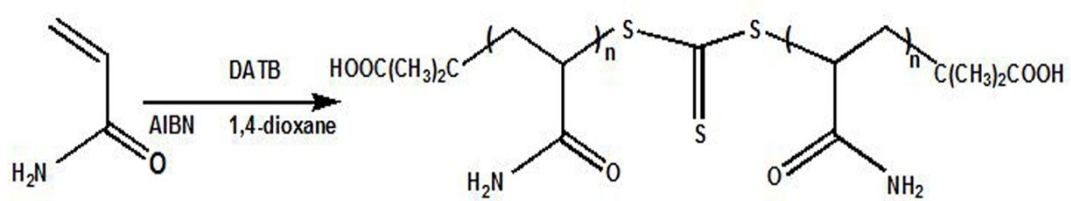

**Figure S1.** Synthesis route of PAM.

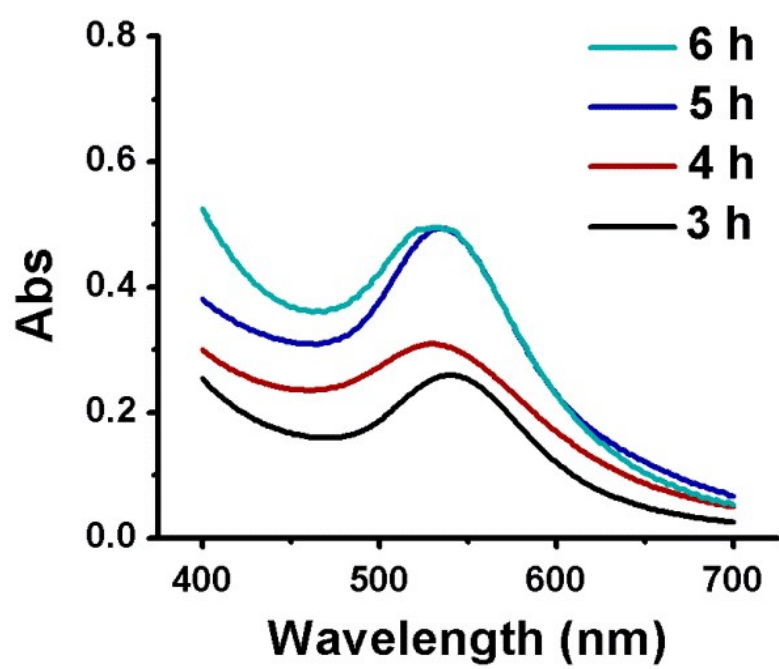

**Figure S2.** Optimization of synthesis time for obtaining the PAM-AuNPs.

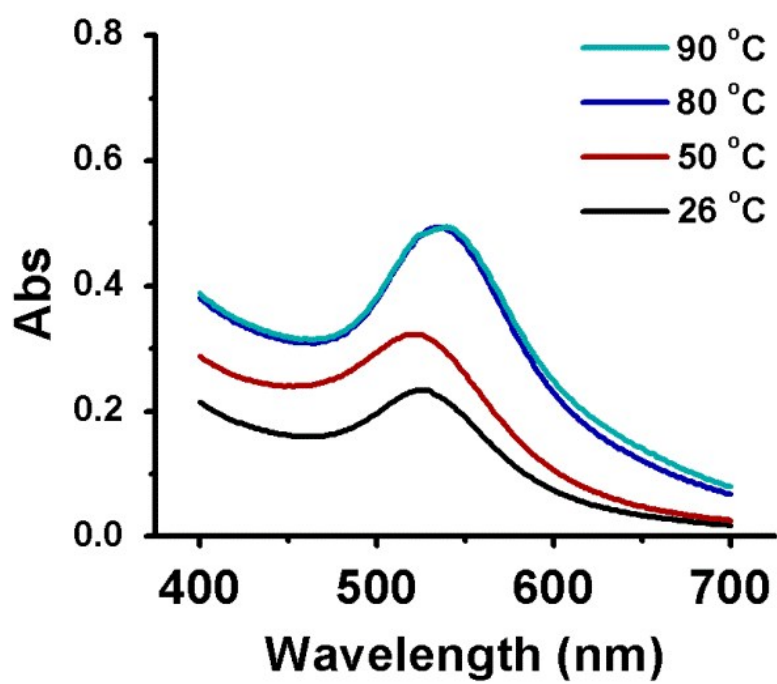

**Figure S3.** Optimization of synthesis temperature for getting the PAM-AuNPs.

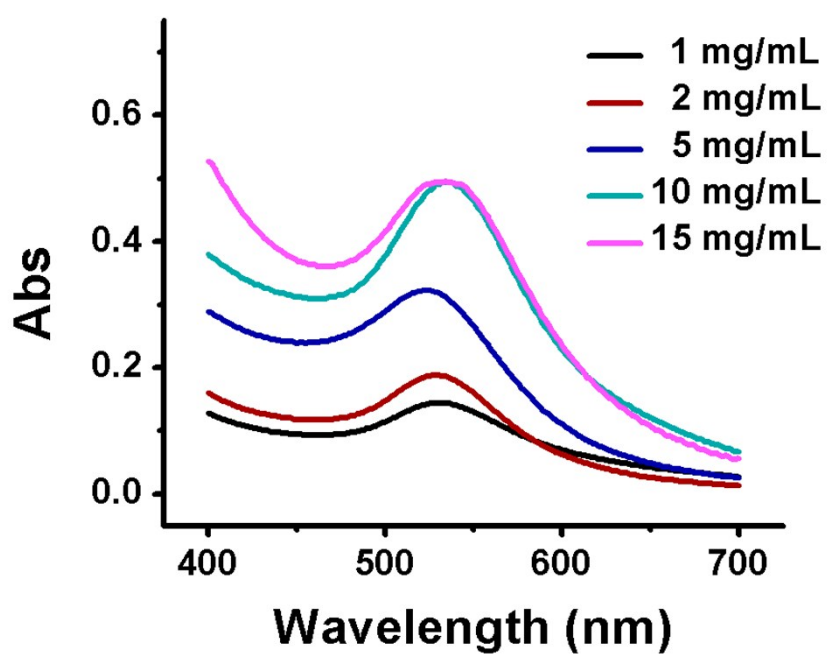

**Figure S4.** The effect of concentration of PAM on the synthesis of PAM-AuNPs.

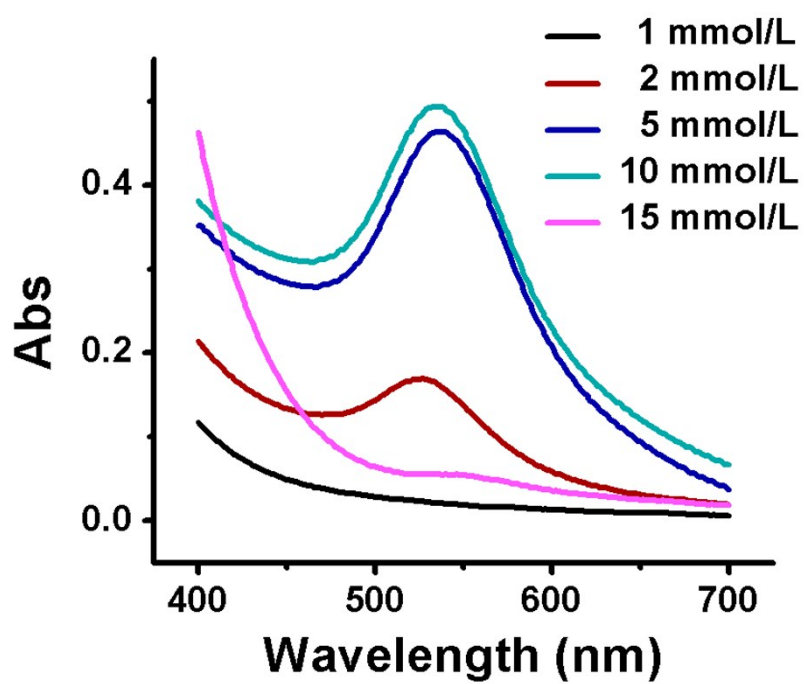

**Figure S5.** The effect of concentration of HAuCl<sub>4</sub> solutions on the synthesis of PAM-AuNPs.

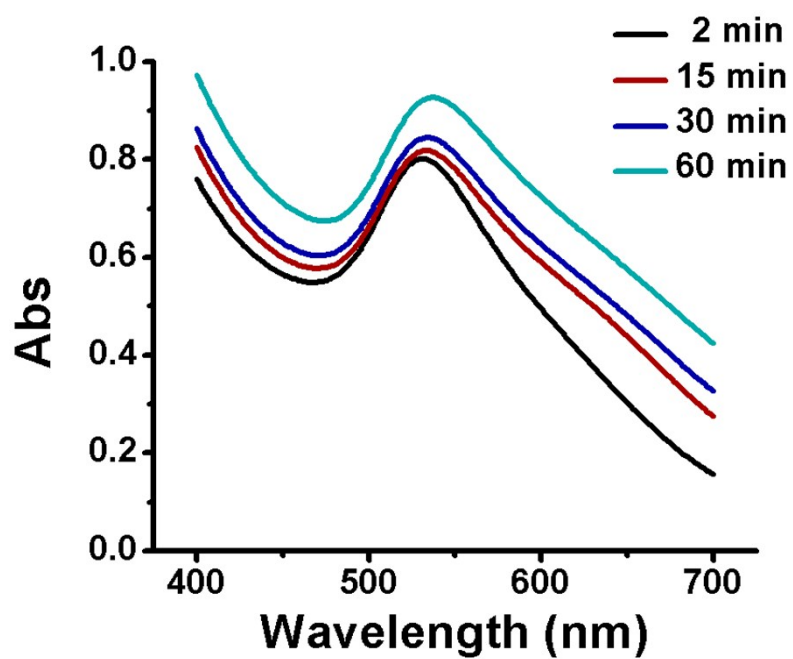

**Figure S6.** UV-vis spectra of PAM-AuNPs after addition of  $\text{Mn}^{2+}$  (1.0 mM) at different sensing reaction time.

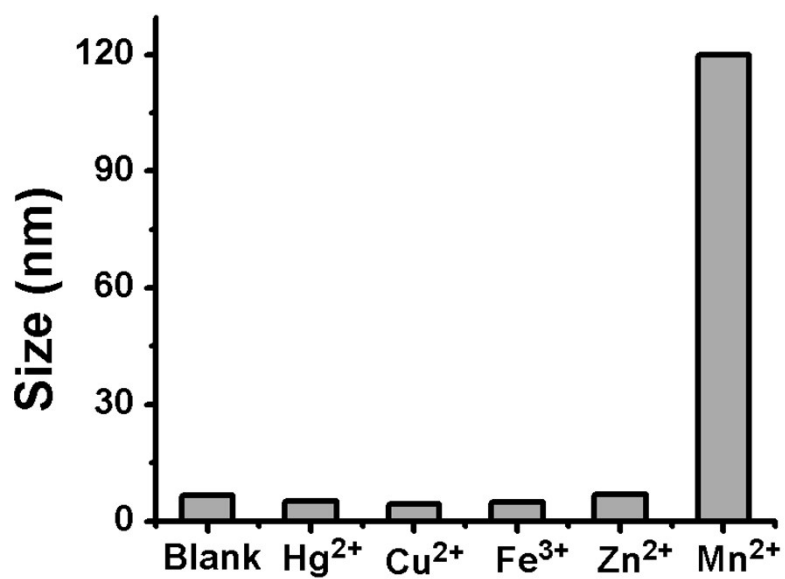

**Figure S7.** DLS of PAM-AuNPs after addition of different cations (each metal cation was 1.0 mmol/L).



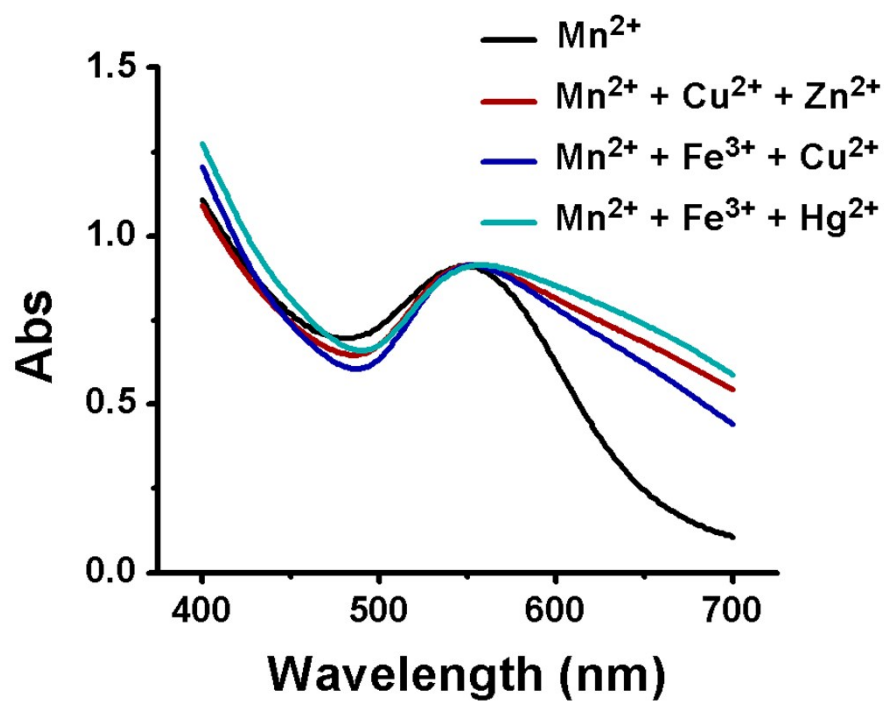

**Figure S8.** UV-vis spectra of PAM-AuNPs with  $\text{Mn}^{2+}$  (1.0 mM) and co-exist other metal cations (each metal cation was 1.0 mmol/L).

**Table S1.** Comparison between our proposed work and the previous works for sensing Mn<sup>2+</sup> ions in water samples

| Species                                      | Nano-particles                                       | LOD (μmol/L) | Sensing ranging (μmol/L) | Samples                    | Ref.                                                                            |
|----------------------------------------------|------------------------------------------------------|--------------|--------------------------|----------------------------|---------------------------------------------------------------------------------|
| <b>Small molecules protected AuNPs/AgNPs</b> | L-Dopa@AuNPs                                         | 0            | 0-100                    | pure water samples         | Narayanan et al, Spectrochim. Acta A: Mol. Biomol. Spectrosc 2014, 131, 132-137 |
|                                              | P <sub>3</sub> O <sub>10</sub> <sup>5-</sup> @ AgNPs | 0.1          | 1.8-20                   | lake and tap water samples | Gao et al, Sens. Actuators B 2013, 181, 288-293                                 |
|                                              | 4-NBA-MA@ AgNPs                                      | 0.05         | 0.5-10                   | drink water samples        | Zhou et al, Talanta 2012, 97, 331-335                                           |
| <b>Polymer protected AuNPs</b>               | PAM@AuNPs                                            | 5.0          | 8.0-500                  | lake and tap water samples | <b>This work</b>                                                                |
